# Supplementary material
Source: PubMed Central journal article supplement (PMC5148197)

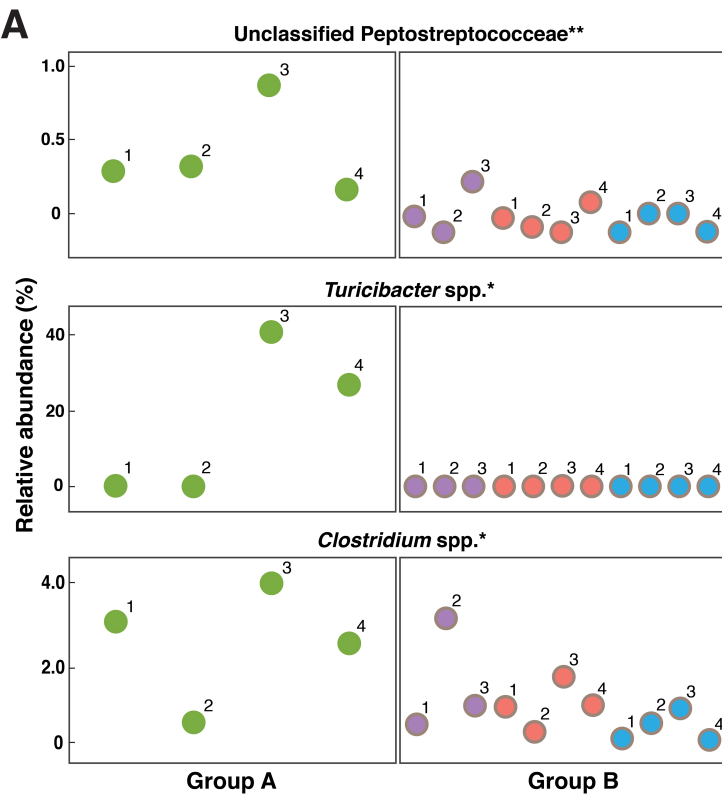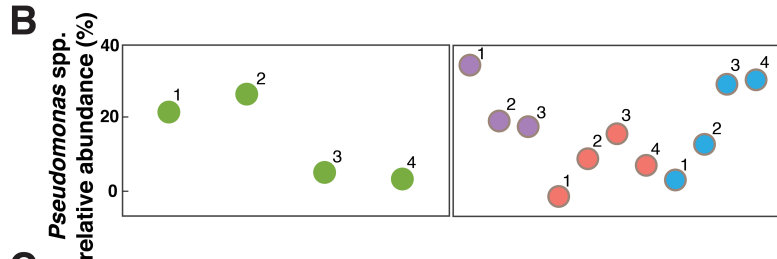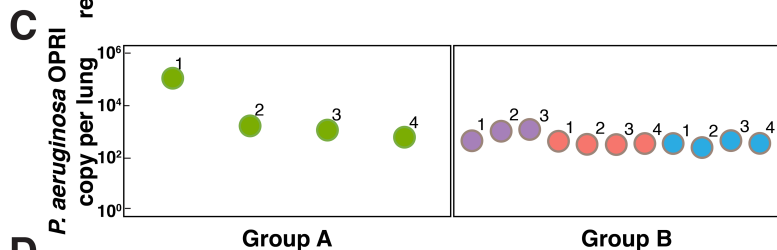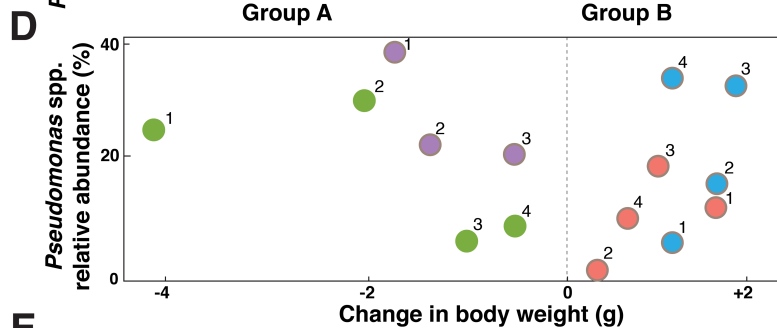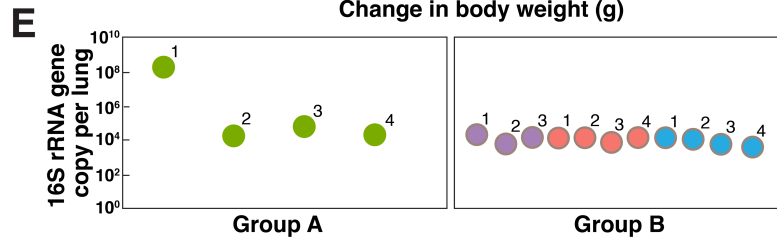

Supplement: ismej201676x4.pdf [file ismej201676x4.pdf]
